# Supplementary material for: Regulating the Electron Localization of Metallic Bismuth for Boosting CO2 Electroreduction
Source: PubMed Central journal article supplement (PMC8683517; doi:10.1007/s40820-021-00772-7), 2021-12-18
Supplement: 40820_2021_772_MOESM1_ESM.pdf [file 40820_2021_772_MOESM1_ESM.pdf]

Supporting Information for

## **Regulating the Electron Localization of Metallic Bismuth for Boosting CO<sub>2</sub> Electroreduction**

Dan Wu<sup>1</sup>, Renfei Feng<sup>2</sup>, Chenyu Xu<sup>3</sup>, Peng-Fei Sui<sup>3</sup>, JiuJun Zhang<sup>4</sup>, Xian-Zhu Fu<sup>1,\*</sup> and Jing-Li Luo<sup>1,\*</sup>

<sup>1</sup>Shenzhen Key Laboratory of Polymer Science and Technology, Guangdong Research Center for Interfacial Engineering of Functional Materials, College of Materials Science and Engineering, Shenzhen University, Shenzhen 518060, P. R. China

<sup>2</sup>Canadian Light Source Inc., Saskatoon, S7N 0X4 Saskatchewan, Canada

<sup>3</sup>Department of Chemical and Materials Engineering, University of Alberta, Edmonton, Alberta T6G 1H9, Canada

<sup>4</sup>Institute for Sustainable Energy/College of Science, Shanghai University, Shanghai 200444, P. R. China

\*Corresponding authors. E-mail: [xz.fu@szu.edu.cn](mailto:xz.fu@szu.edu.cn) (Xian-Zhu Fu), [jingli.luo@ualberta.ca](mailto:jingli.luo@ualberta.ca) (Jing-Li Luo)

### **S1 Experimental Section**

#### **S1.1 Flow Cell Measurements**

The flow cell measurements were performed within a custom-designed flow cell reactor consisting catalysts loaded gas-diffusion layer (1 cm<sup>2</sup>) as the cathode, anion exchange membrane separator and Pt sheet as the anode. These three compositions were positioned and clamped together using polytetrafluoroethylene spacers for electrolyte circulation. Ag/AgCl reference electrode (saturated KCl) was located inside the cathode compartment. During the measurement, the CO<sub>2</sub> gas feed for the reaction was supplied at rate of 20 mL min<sup>-1</sup> as a continuous stream over the cathodic GDL using a flow controller (D07-19B, Sevenstar). 1M KOH was used as the electrolyte. Both the catholyte and the anolyte streams were circulated through the electrolyte channels using a syringe pump (BT100-2 J, LONGER) at flow rate of 8 mL min<sup>-1</sup>.

#### **S1.2 Raman Spectroscopy Measurements**

The Raman spectra acquisition was carried out using a RENIDHAW in via Raman Microscope and 514 nm excitation laser. A homemade H-type in situ cell was used for Raman signal collection with a piece of round quartz glass on the top of the cell to allow light transmission. A piece of the catalysts supported carbon paper was inserted through the wall of the cell to keep the plane of the working electrode perpendicular to the incident laser. Pt wire was used as a counter electrode and Ag/AgCl (saturated KCl) was used as a reference electrode. A 0.5 M NaHCO<sub>3</sub> aqueous solution with CO<sub>2</sub> bubbling continuously was pumped through the cathode compartment. The Raman spectra were then recorded at different potentials that driven by a potential station.

### **S2 Supplementary Figures and Table**

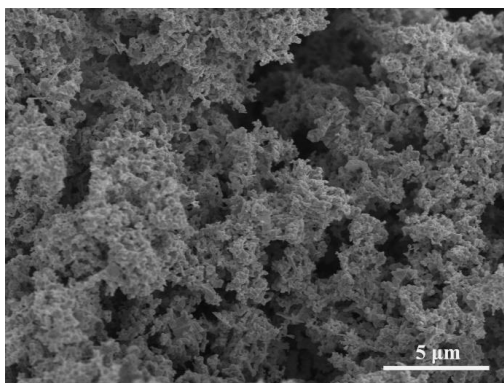

**Fig. S1** SEM image of Bi-H sample

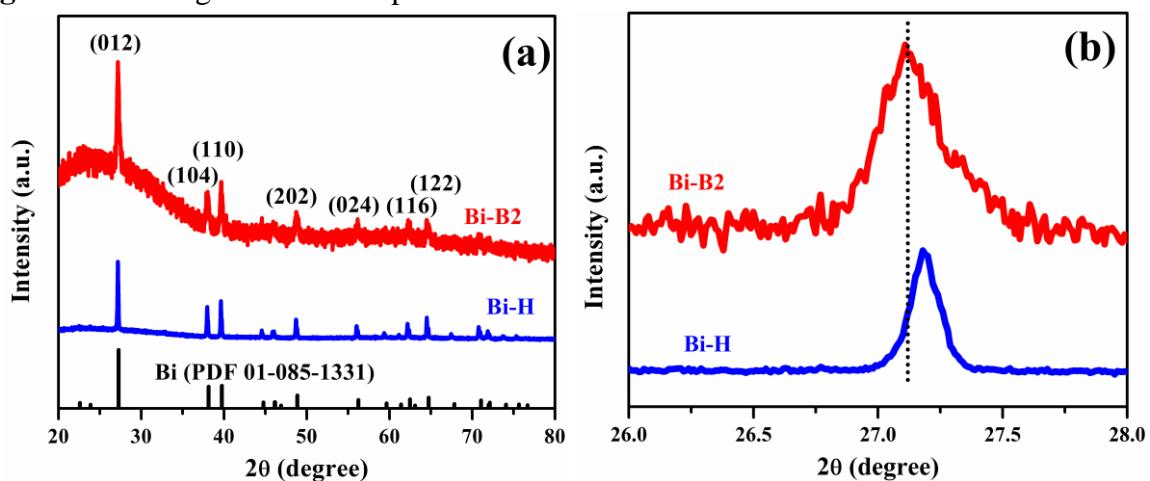

**Fig. S2** XRD patterns of (a) Bi-H and (b) Bi-B2 catalysts

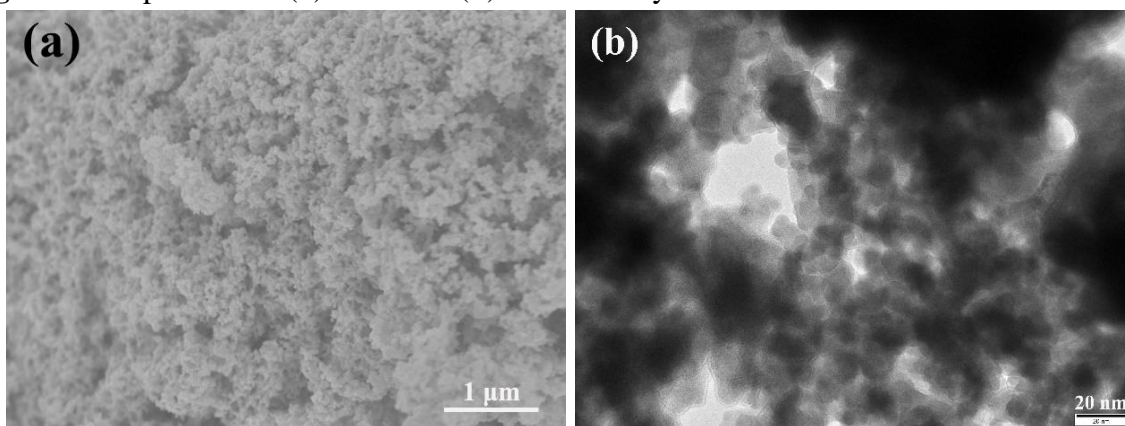

**Fig. S3** (a) SEM and (b) TEM images of Bi-B2 sample

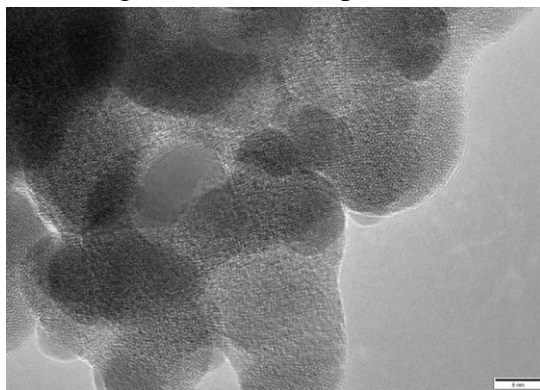

**Fig. S4** HRTEM images of Bi-B2 sample

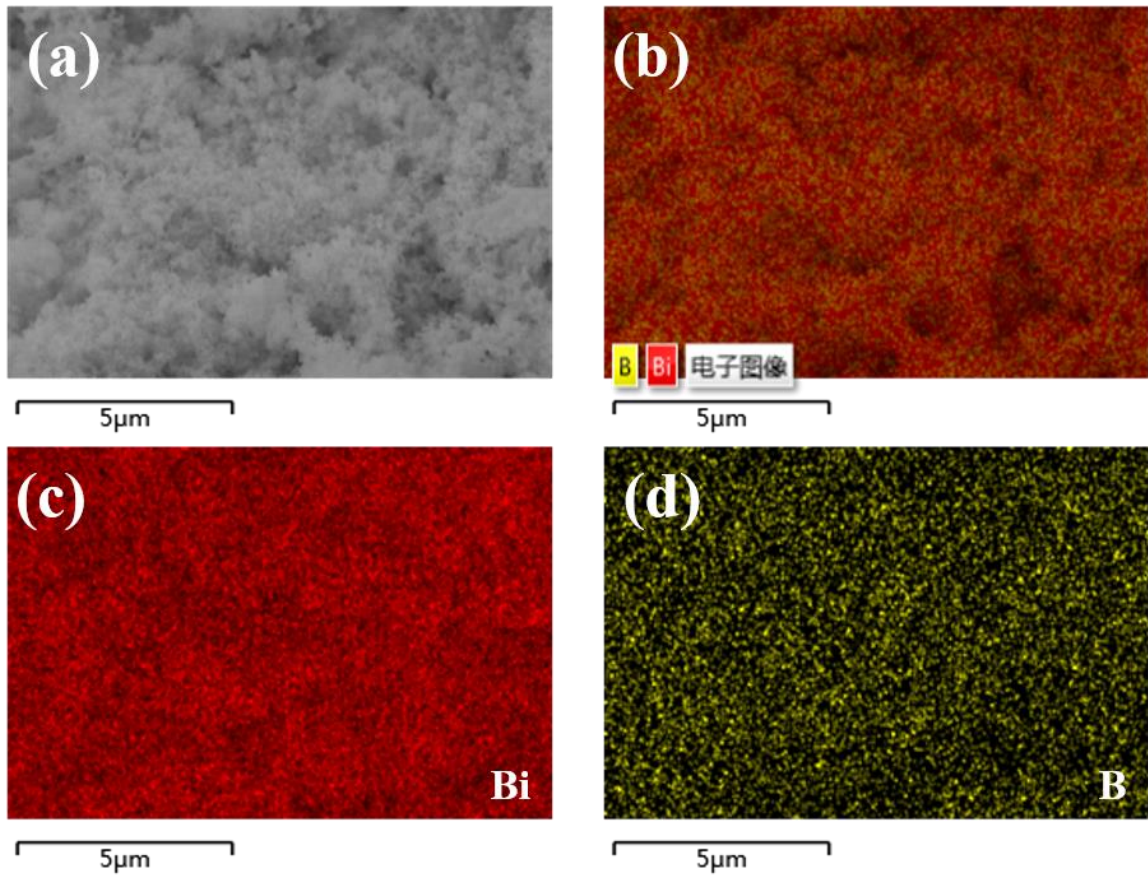

**Fig. S5** (a) SEM and corresponding elemental mappings of (b) overall, (c) Bi and (d) B for Bi-B2 sample

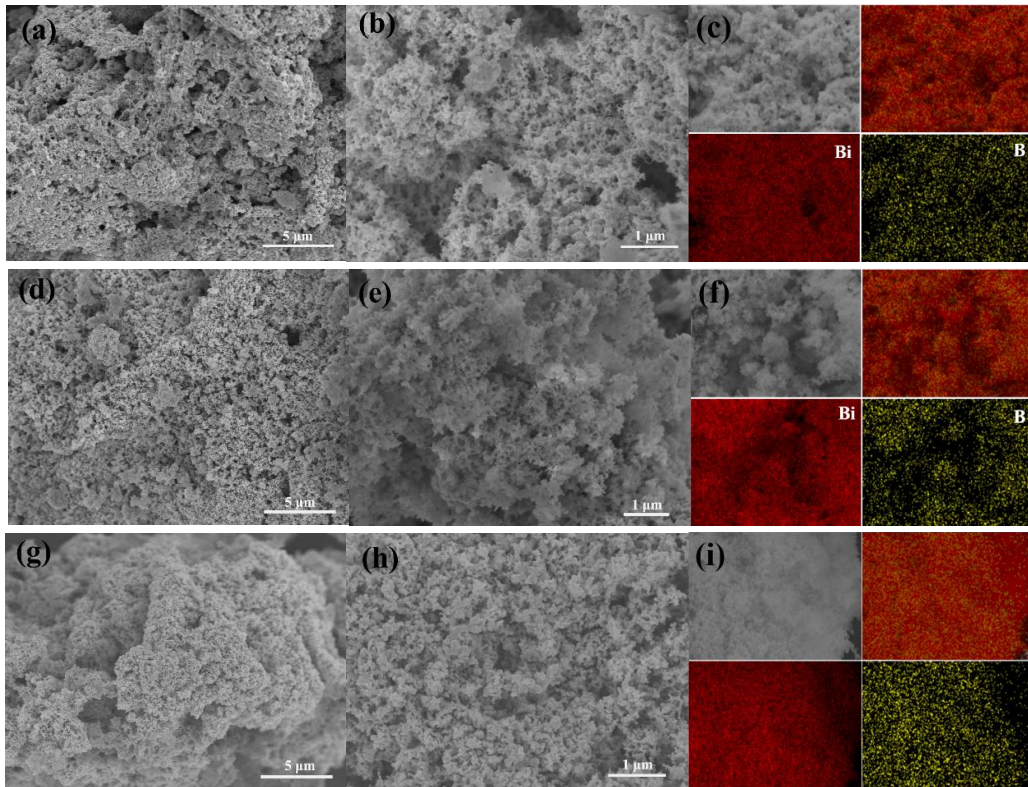

**Fig. S6** SEM images of (a, b) Bi-B4, (d, e) Bi-B3, (g, h) Bi-B1 and corresponding EDX mappings of (c) Bi-B4, (f) Bi-B3 and (i) Bi-B1 samples

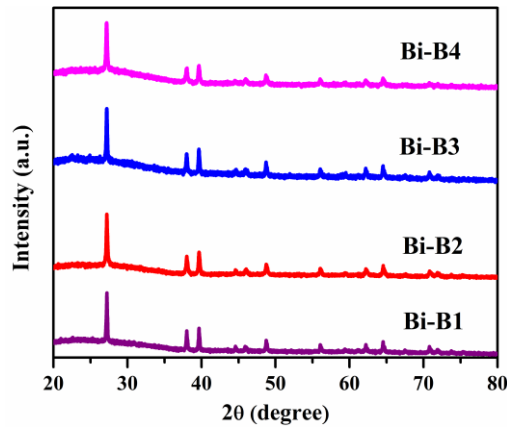

Fig. S7 XRD patterns of Bi-B4, Bi-B3, Bi-B2 and Bi-B1 samples

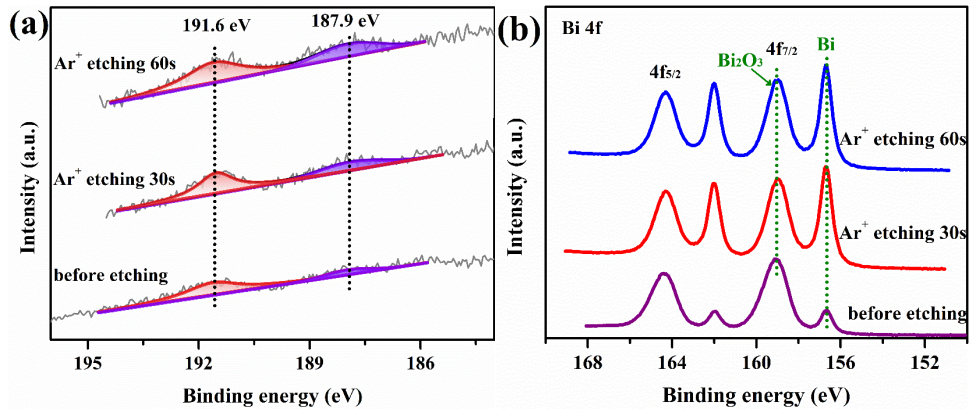

Fig. S8 XPS spectra for (a) B 1s and (b) Bi 4f of Bi-B2 with Ar<sup>+</sup> etching

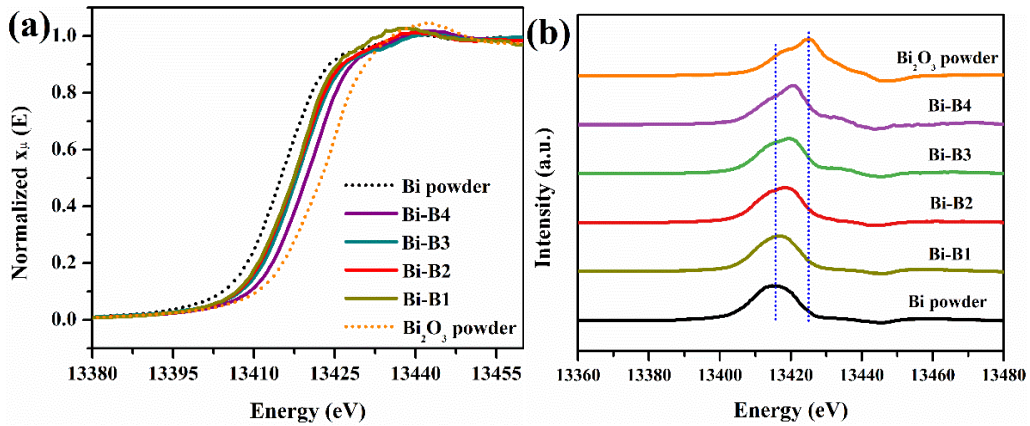

Fig. S9 (a) Bi L-edge edge XANES spectra and (b) corresponding first derivatives of samples. Commercial Bi and Bi<sub>2</sub>O<sub>3</sub> powders are also listed as the references

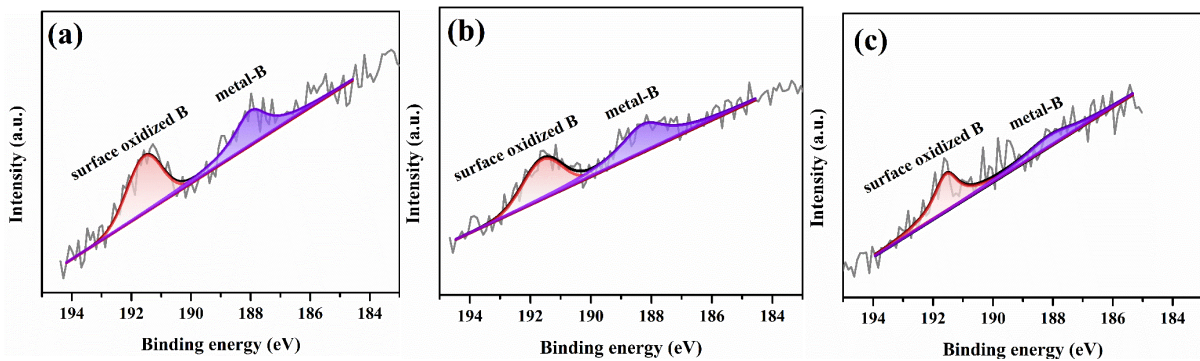

Fig. S10 XPS B 1s spectra of (a) Bi-B4, (b) Bi-B3 and (c) Bi-B1 samples

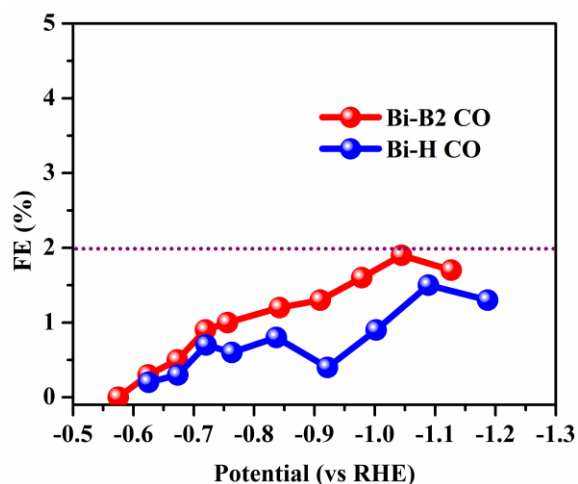

Fig. S11 FEs of CO on Bi-B2 and Bi-H samples

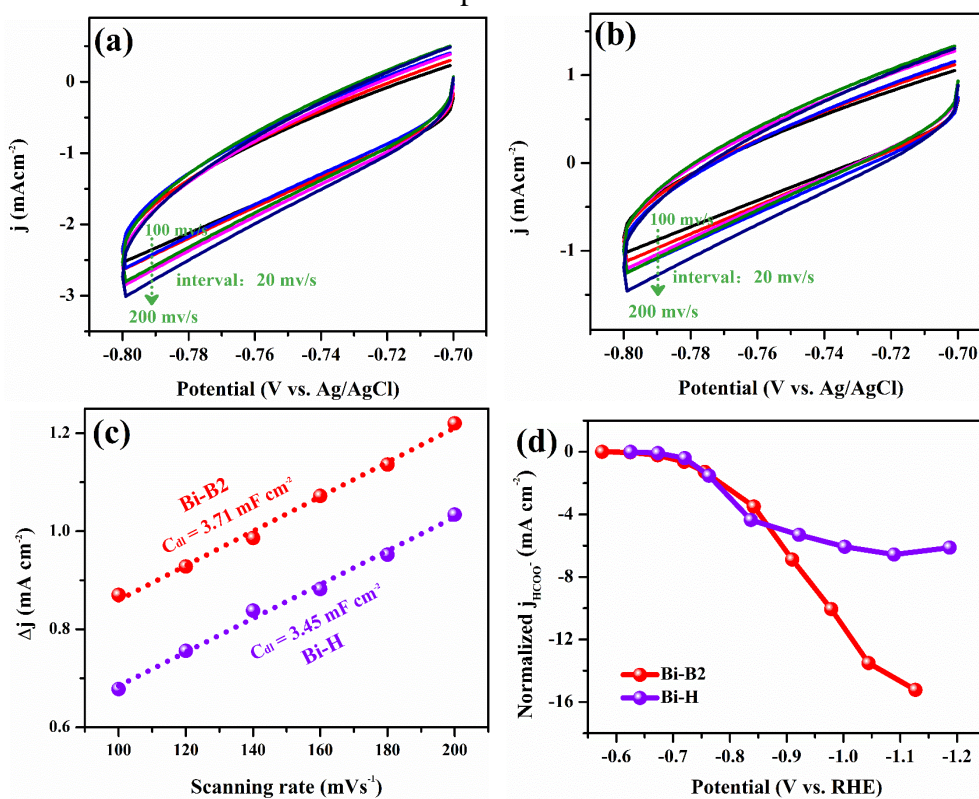

Fig. S12 CV curves for (a) Bi-B2 and (b) Bi-H, (c) corresponding current density differences plotted against scanning rates, and (d) normalized formate partial current density

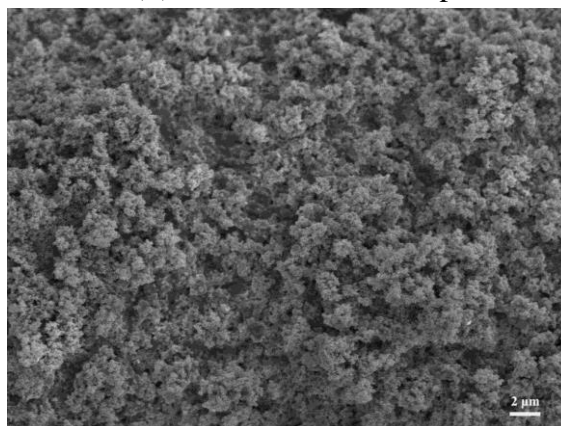

Fig. S13 SEM images of the Bi-B2 catalyst after long-time electrolysis

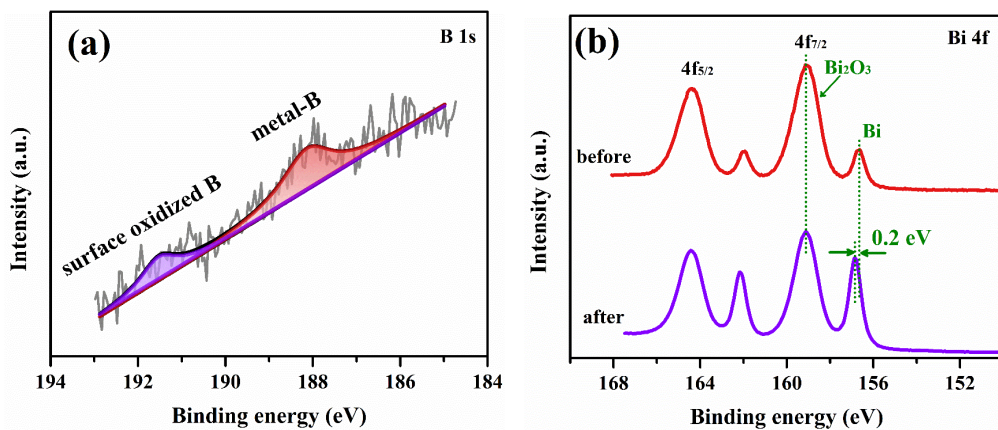

Fig. S14 XPS spectra of (a) B 1s and (b) Bi 4f of the Bi-B2 catalyst after long-time electrolysis

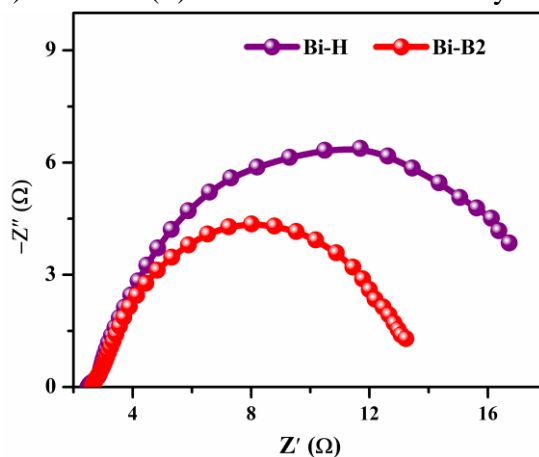

Fig. S15 Nyquist plots of Bi-B2 and Bi-H samples

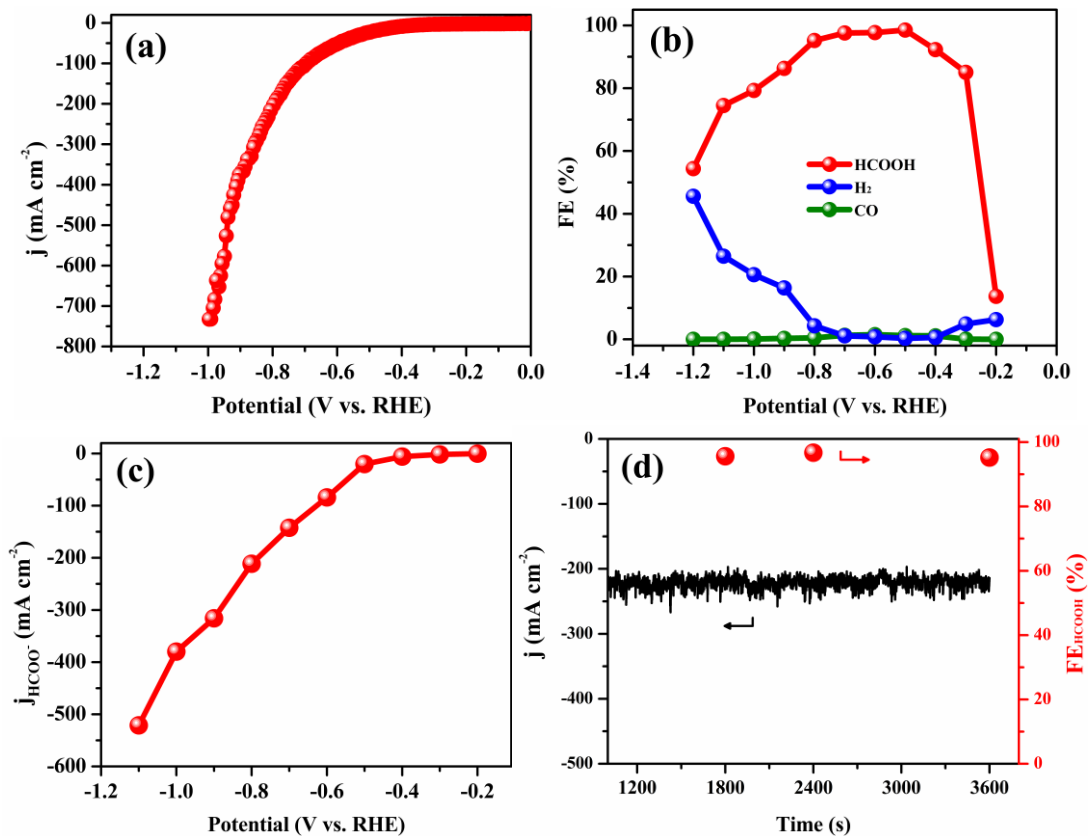

Fig. S16 (a) LSV curve, (b) FEs of formate, H<sub>2</sub> and CO, (c) formate partial current density and (d) stability test at -0.8 V (vs RHE) for the Bi-B2 catalysts in the flow cell

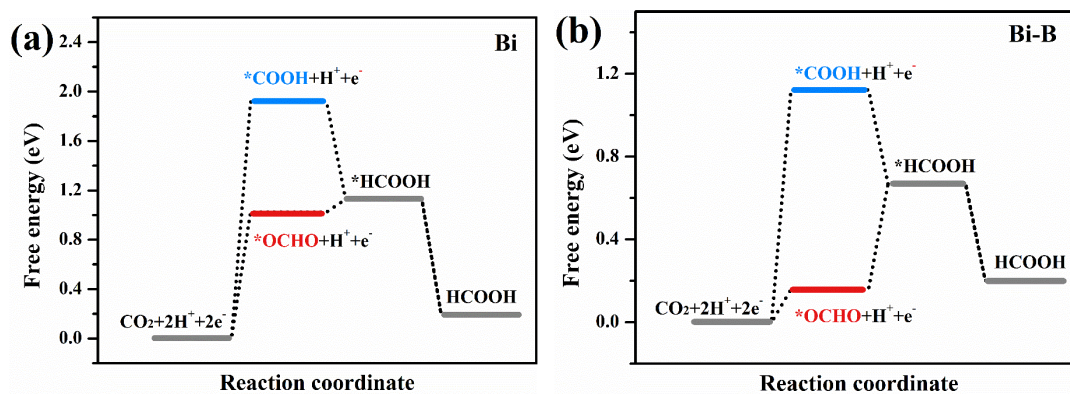

**Fig. S17** Free energy diagrams the reaction pathways for the formate generation in terms of two intermediates on the (012) plane for (a) Bi and (b) Bi-B

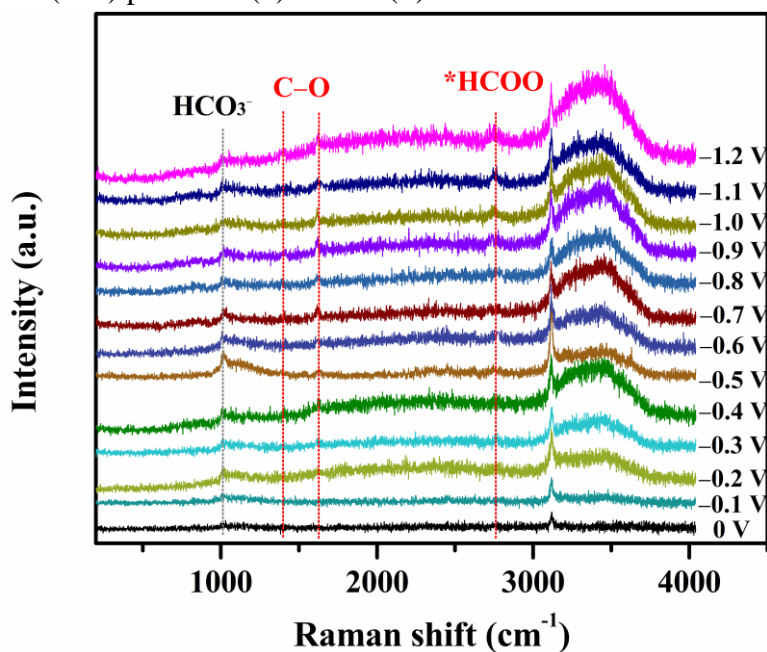

**Fig. S18** In situ Raman spectra of Bi-B2 during electrochemical reduction of  $\text{CO}_2$  at different potentials (vs RHE) in  $0.5 \text{ M CO}_2$ -saturated  $\text{KHCO}_3$

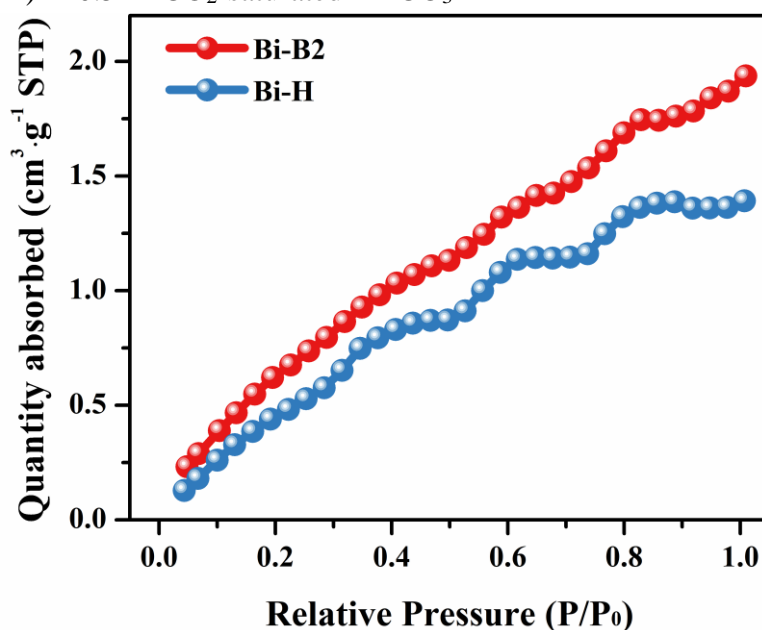

**Fig. S19** Room-temperature  $\text{CO}_2$  adsorption isotherms for Bi-H and Bi-B2

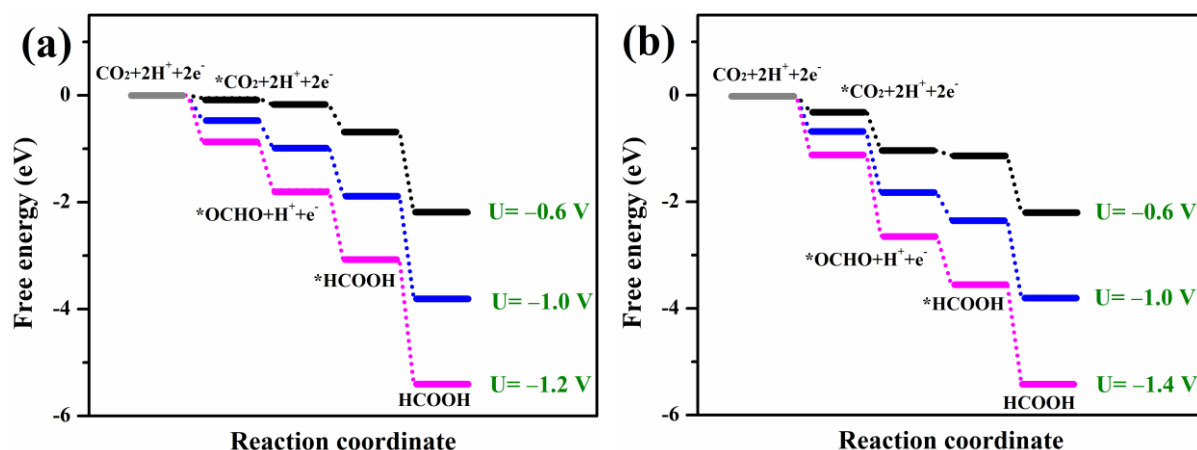

**Fig. S20** Calculated free-energy diagrams at different external potentials ( $U = -0.6$ ,  $-1.0$  and  $-1.4$  V) for CO<sub>2</sub> reduction to HCOOH on (a) Bi(012) and (b) Bi-B(012) surfaces

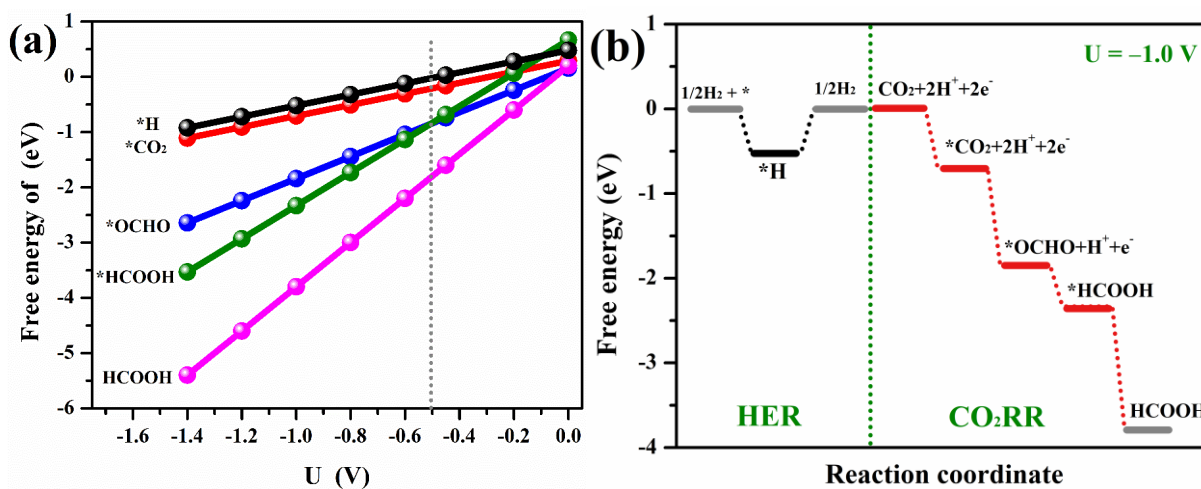

**Fig. S21** Calculated free-energy diagrams of key intermediates for \*H, \*CO<sub>2</sub>, \*OCHO, \*HCOOH and HCOOH (a) at different  $U$ s and (b) at  $U = -1.0$  V as an example on Bi-B (012) surface

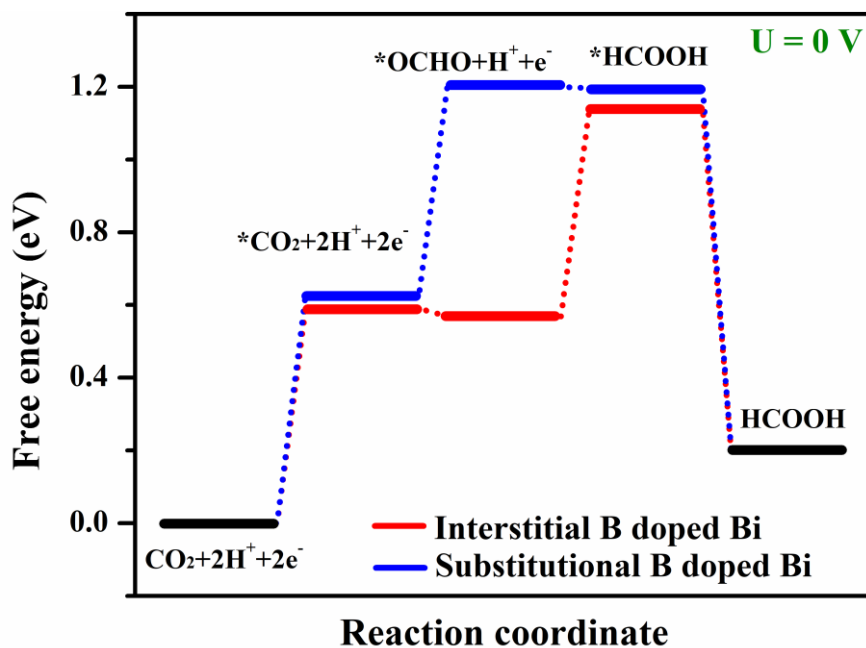

**Fig. S22** Free energy diagrams of interstitial and substitutional B doped Bi with 1/18 ML configuration at  $U = 0$  V



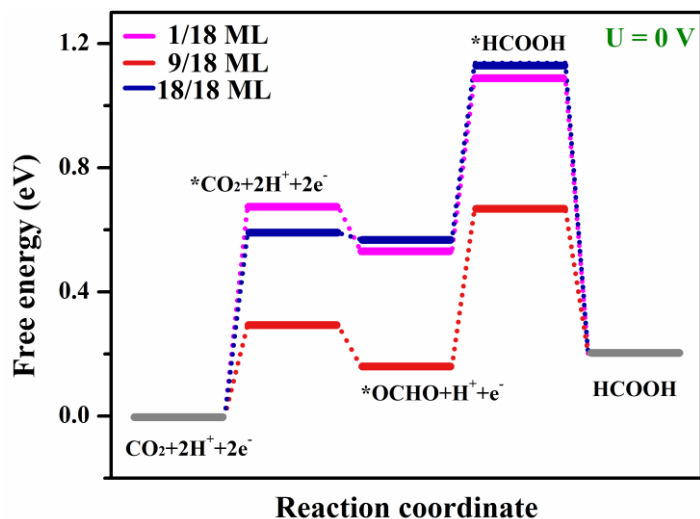

Fig. S23 Free energy diagrams of Bi with different B concentrations at  $U = 0$  V

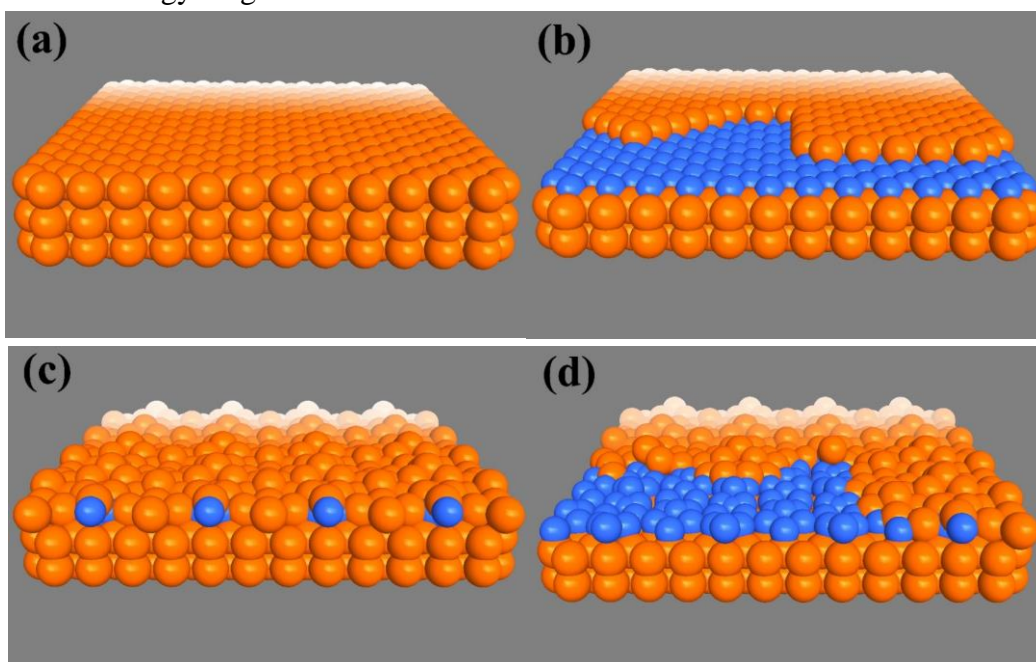

Fig. S24 (a, b) Initial and (c, d) after geometrical optimization DFT models of a B-doped Bi surface with a 18/18 ML concentration of boron

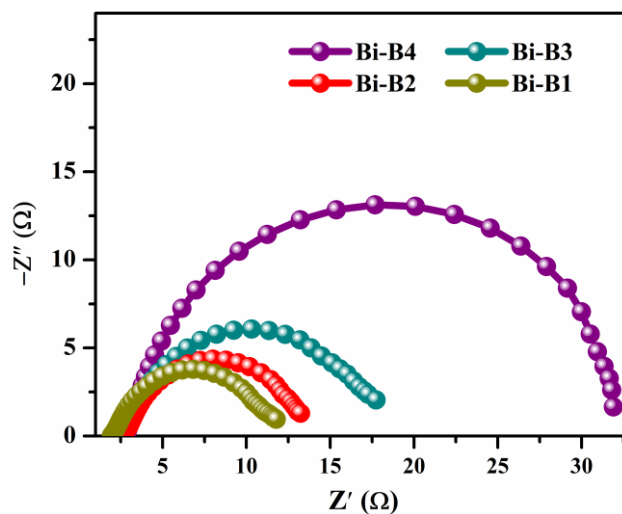

Fig. S25 Nyquist plots of different Bi-B samples

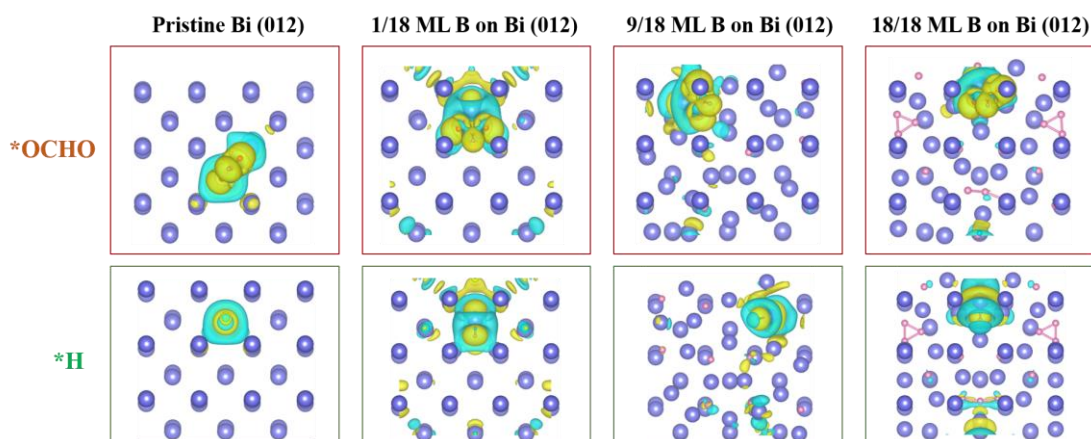

**Fig. S26** Top view of differential charge densities of \*OCHO and \*H adsorbed on different surfaces, regions of yellow and cyan denote electron accumulation and depletion, respectively. Blue, pink, brown, red, and pale balls represent Bi, B, C, O, and H atoms, respectively. (The value of isosurface is  $0.0005 e \text{ \AA}^{-3}$ )

**Table S1**

| Catalyst                          | Electrolyte (KHCO <sub>3</sub> ) | Potential range (FE>90%) | Potential range (FE>95%) | Refs.     |
|-----------------------------------|----------------------------------|--------------------------|--------------------------|-----------|
| Bismuthene                        | 0.5 M                            | -0.73 V~<br>-1.18 V      | -0.83 V~<br>-1.18V       | [S1]      |
| Bi nanosheet                      | 0.1 M                            | -0.6 V~<br>-0.95 V       | -0.77 V~<br>-0.87 V      | [S2]      |
| Bi Nanosheet                      | 0.5 M                            | -0.7 V~<br>-0.8 V        | -0.7 V                   | [S3]      |
| Bi Nanosheet                      | 0.1 M                            | -0.9 V                   | none                     | [S4]      |
| nanoscale Bi                      | 0.5 M                            | -0.97 V~<br>-1.17 V      | -0.97 V                  | [S5]      |
| Bi/rGO                            | 0.1 M                            | -0.8 V ~<br>-0.9 V       | -0.8 V                   | [S6]      |
| dendritic Bi                      | 0.5 M                            | -0.72 V~<br>-0.92 V      | -0.82 V                  | [S7]      |
| Bi nanotube                       | 0.5 M                            | -0.78 V~<br>-1.2 V       | -0.9 V~<br>-1.05 V       | [S8]      |
| Bi-NSS                            | 0.1 M                            | -1.0 V~<br>-1.3 V        | -1.1 V~<br>-1.2 V        | [S9]      |
| Bi@Bi <sub>2</sub> O <sub>3</sub> | 0.5 M                            | -0.65 V~<br>-1.0 V       | -0.72 V~<br>-0.9 V       | [S10]     |
| Bi NWs                            | -                                | -0.69 V ~<br>-0.99 V     | -0.69 V                  | [S11]     |
| NTD-Bi                            | 0.5 M                            | -1.0 ~<br>-0.7V          | -0.75 V ~<br>-0.9 V      | [S12]     |
| Bi-B2                             | 0.5 M                            | -0.72 V~<br>-1.22 V      | -0.75 V~<br>-1.13 V      | This work |

## Supplementary References

- [S1] C. Cao, D.D. Ma, J.F. Gu, X. Xie, G. Zeng et al., Metal-organic layers leading to atomically thin bismuthene for efficient carbon dioxide electroreduction to liquid fuel. *Angew. Chem. Int. Edit.* **59**(35), 15014-15020 (2020). <https://doi.org/10.1002/anie.202005577>
- [S2] M.M. Zhao, Y.L. Gu, W.C. Gao, P.X. Cui, H. Tang et al., Atom vacancies induced electron-rich surface of ultrathin Bi nanosheet for efficient electrochemical CO<sub>2</sub> reduction. *Appl. Catal. B Environ.* **266**, 118625 (2020). <https://doi.org/10.1016/j.apcatb.2020.118625>
- [S3] L. Yi, J. Chen, P. Shao, J. Huang, X. Peng et al., Molten salt assisted synthesis of bismuth nanosheets for long-term continuously electrocatalytic conversion CO<sub>2</sub> to formate. *Angew. Chem. Int. Edit.* **59**, 20112-20119 (2020). <https://doi.org/10.1002/anie.202008316>
- [S4] F. Li, G.H. Gu, C. Choi, P. Kolla, S. Hong et al., Highly stable two-dimensional bismuth metal-organic frameworks for efficient electrochemical reduction of CO<sub>2</sub>. *Appl. Catal. B Environ.* **277**, 119241 (2020). <https://doi.org/10.1016/j.apcatb.2020.119241>
- [S5] P. Lamagni, M. Miola, J. Catalano, M.S. Hvid, M.A.H. Mamakhel et al., Restructuring metal-organic frameworks to nanoscale bismuth electrocatalysts for highly active and selective CO<sub>2</sub> reduction to formate. *Adv. Funct. Mater.* **30**(16), 1910408 (2020). <https://doi.org/10.1002/adfm.201910408>
- [S6] Y.X. Duan, K.H. Liu, Q. Zhang, J.M. Yan, Q. Jiang, Efficient CO<sub>2</sub> reduction to HCOOH with high selectivity and energy efficiency over Bi/rGO catalyst. *Small Methods* **4**(5), 1900846 (2020). <https://doi.org/10.1002/smtd.201900846>
- [S7] M.Y. Fan, S. Prabhudev, S. Garbarino, J.L. Qiao, G.A. Botton et al., Uncovering the nature of electroactive sites in nano architected dendritic Bi for highly efficient CO<sub>2</sub> electroreduction to formate. *Appl. Catal. B Environ.* **274**, 119031 (2020). <https://doi.org/10.1016/j.apcatb.2020.119031>
- [S8] K. Fan, Y.F. Jia, Y.F. Ji, P.Y. Kuang, B.C. Zhu et al., Curved surface boosts electrochemical CO<sub>2</sub> reduction to formate via bismuth nanotubes in a wide potential window. *ACS Catal.* **10**(1), 358-364 (2020). <https://doi.org/10.1021/acscatal.9b04516>
- [S9] F.L. Meng, Q. Zhang, Y.X. Duan, K.H. Liu, X.B. Zhang, Structural optimization of metal oxyhalide for CO<sub>2</sub> reduction with high selectivity and current density. *Chin. J. Chem.* **38**(12), 1752-1756 (2020). <https://doi.org/10.1002/cjoc.202000203>
- [S10] Y.R. Wang, R.X. Yang, Y.F. Chen, G.K. Gao, Y.J. Wang et al., Chloroplast-like porous bismuth-based core-shell structure for high energy efficiency CO<sub>2</sub> electroreduction. *Sci. Bulletin.* **65**(19), 1635-1642 (2020). <https://doi.org/10.1016/j.scib.2020.05.010>
- [S11] X.L. Zhang, X.H. Sun, S.X. Guo, A.M. Bond, J. Zhang, Formation of lattice-dislocated bismuth nanowires on copper foam for enhanced electrocatalytic CO<sub>2</sub> reduction at low overpotential. *Energy Environ. Sci.* **12**(4), 1334-1340 (2019). <https://doi.org/10.1039/C9EE00018F>
- [S12] Q.F. Gong, P. Ding, M.Q. Xu, X.R. Zhu, M.Y. Wang et al., Structural defects on converted bismuth oxide nanotubes enable highly active electrocatalysis of carbon dioxide reduction. *Nat. Commun.* **10**, 2807 (2019). <https://doi.org/10.1038/s41467-019-10819-4>
